# Effect of Alanine Replacement of L17 and F19 on the Aggregation and Neurotoxicity of Arctic-Type A $\beta$ <sub>40</sub>

Yi-Ru Chen<sup>1,2</sup>, Hsien-bin Huang<sup>3</sup>, Chi-Jen Lo<sup>1,4,5</sup>, Chih-Ching Wang<sup>1,5</sup>, Li-Kang Ho<sup>2</sup>, Hsin-Tzu Liu<sup>6</sup>, Ming-Shi Shiao<sup>7</sup>, Ta-Hsien Lin<sup>1,4,5\*</sup>, Yi-Cheng Chen<sup>8\*</sup>

**1** Structural Biology Program, National Yang-Ming University, Taipei, Taiwan, R.O.C, **2** Department and Institute of Pharmacology, National Yang-Ming University, Taipei, Taiwan, R.O.C, **3** Department of Life Science and Institute of Molecular Biology, National Chung Cheng University, Chia-Yi, Taiwan, R.O.C, **4** Department of Medical Research and Education, Taipei Veterans General Hospital, Taipei, Taiwan, R.O.C, **5** Institute of Biochemistry and Molecular Biology, National Yang-Ming University, Taipei, Taiwan, R.O.C, **6** Voiding Dysfunction Therapeutic Center in the Research Department, Buddhist Tzu Chi General Hospital, Hualien, Taiwan, R.O.C, **7** Department of Life Science, Chang Gung University, Kwei-Shan Tao-Yuan, Taiwan, R.O.C, **8** Department of Medicine, MacKay Medical College, New Taipei City, Taiwan, R.O.C

## Abstract

Alzheimer's disease is the most common form of neurodegenerative disease. Beta-amyloid peptides (A $\beta$ ) are responsible for neuronal death both *in vitro* and *in vivo*. Previously, L17 and F19 residues were identified as playing key roles in the stabilization of the A $\beta$ <sub>40</sub> conformation and in the reduction of its neurotoxicity. In this study, the effects of L17A/F19A mutations on the neurotoxicity of A $\beta$  genetic mutant Arctic-type A $\beta$ <sub>40</sub>(E22G) were tested. The results showed that compared to A $\beta$ <sub>40</sub>(E22G), A $\beta$ <sub>40</sub>(L17A/F19A/E22G) reduced the rate of conformation conversion, aggregation, and cytotoxicity, suggesting that L17 and F19 are critical residues responsible for conformational changes which may trigger the neurotoxic cascade of A $\beta$ . A $\beta$ <sub>40</sub>(L17A/F19A/E22G) also had decreased damage due to reactive oxygen species. The results are consistent with the discordant helix hypothesis, and confirm that residues 17–25 are in the discordant helix region. Compared to A $\beta$ <sub>40</sub>(L17A/F19A), reduction in aggregation of A $\beta$ <sub>40</sub>(L17A/F19A/E22G) was less significantly decreased. This observation provides an explanation based on the discordant helix hypothesis that the mutation of E22 to G22 of A $\beta$ <sub>40</sub>(E22G) alters the propensity of the discordant helix. Arctic-type A $\beta$ <sub>40</sub>(E22G) aggregates more severely than wild-type A $\beta$ <sub>40</sub>, with a consequential increase in toxicity.

**Citation:** Chen Y-R, Huang H-b, Lo C-J, Wang C-C, Ho L-K, et al. (2013) Effect of Alanine Replacement of L17 and F19 on the Aggregation and Neurotoxicity of Arctic-Type A $\beta$ <sub>40</sub>. PLoS ONE 8(4): e61874. doi:10.1371/journal.pone.0061874

**Editor:** Damian Christopher Crowther, Cambridge Institute for Medical Research, United Kingdom

**Received:** December 29, 2012; **Accepted:** March 15, 2013; **Published:** April 25, 2013

**Copyright:** © 2013 Chen et al. This is an open-access article distributed under the terms of the Creative Commons Attribution License, which permits unrestricted use, distribution, and reproduction in any medium, provided the original author and source are credited.

**Funding:** This work was supported by grants from National Science Council of Taiwan, ROC (NSC96-2311-B-010-010-MY3 and NSC100-2113-M-010-001 to T.H.L. and NSC100-2627-M-715-001 and NSC101-2627-M-715-001 to Y.C.C.), Taipei Veterans General Hospital, Taiwan, Republic of China (V96C1-022, V96S4-002 to T.H.L.) and a grant from Ministry of Education, Aiming for the Top University Plan. The funders had no role in study design, data collection and analysis, decision to publish, or preparation of the manuscript.

**Competing Interests:** The authors have declared that no competing interests exist.

\* E-mail: chen15@mmc.edu.tw (YCC); thlin@vghtpe.gov.tw (THL)

## Introduction

Alzheimer's disease (AD) is the most common neurodegenerative disease in the elderly population [1–3]. There are two forms of AD, late onset sporadic (SAD) and early onset familial (FAD) [4]. SAD is predominantly diagnosed in people over 65 years of age, and less frequent FAD often occurs in patients under the age of 65 years [5,6]. FAD is clinically considered the most serious form of AD. Regardless of the form of AD, amyloid senile plaques (SPs) and neurofibrillary tangles (NFTs) are the two most important pathological hallmarks in the brains of AD patients [7]. In SPs, the main component is the  $\beta$  amyloid peptide (A $\beta$ ), that is either 40 (A $\beta$ <sub>40</sub>) or 42 (A $\beta$ <sub>42</sub>) amino acids long, containing hydrophobic amino acid sequences at its C-termini. This peptide is the proteolytic product of the amyloid precursor protein (APP), which is sequentially cleaved first by  $\beta$ -secretase, then by  $\gamma$ -secretase [8,9].

Amyloid deposits of A $\beta$  peptides for both SAD and FAD, including oligomers, protofibrils, and fibrils have been demonstrated to be toxic to neural cells, and are the main causative agents leading to AD [10,11]. The neurotoxicity induced by A $\beta$  aggregates has been associated with formation of reactive oxygen

species (ROS) and reactive nitrogen species (RNS) [12,13]. Furthermore, neurotoxicity is highly correlated with its structural and molecular states [14]. Fibrilligenesis of A $\beta$  is usually accompanied by a conformational conversion from either  $\alpha$ -helix or random coil to  $\beta$ -sheet/strands during the aggregation process [15,16]. The conformation of A $\beta$  is well correlated with sequence and toxicity. Using different A $\beta$  fragments or truncated A $\beta$  peptides, several sequence regions, including residues 17–20, 30–35, and 41–42, have been shown to play roles in conformation and toxicity [17–19].

For FAD, several hereditary mutations have been identified [20]. Flemish-type A $\beta$ (A21G) [21], Arctic-type A $\beta$ (E22G) [22,23], Dutch-type A $\beta$ (E22Q) [24], Italian-type A $\beta$ (E22K) [25], and Iowa-type A $\beta$ (D23N) [26] are the most well-known. Few studies have characterized the folding, aggregation, and toxicity of Arctic-type A $\beta$ (E22G) [27–29]. Compared with wild-type A $\beta$ <sub>40</sub>, Arctic-type A $\beta$ (E22G) shows a higher propensity to form  $\beta$ -strand structures and exhibit rapid aggregation, with accompanying severe toxicity. By creating mutants that can inhibit conformational change and result in stable secondary structures, it may be possible to identify key residues that affect the processes of aggregation and conformational change.

To reduce toxicity induced by A $\beta$ , it is necessary to prevent structural conversion and aggregation of A $\beta$  [15,16,30]. Several studies have suggested that residues 16–23 constitute a region of the discordant helix [30–34], and any factors which stabilize the conformation of this region can prevent the aggregation and reduce toxicity of A $\beta_{40}$  [32,35]. Our previous studies found that 17–25 is the discordant helix region that can stabilize A $\beta$  structure and inhibit aggregation [36]. This identification provides the basis for determining key residues that can increase helical propensity. Previously, we identified L17 and F19 as key amino acids in the stabilization of the A $\beta_{40}$  conformation. By constructing an A $\beta_{40}$ (L17A/F19A) mutant, we further demonstrated that replacement of L17 and F19 with alanine can stabilize the A $\beta$  conformation, reduce A $\beta$  aggregation, and diminish A $\beta$ -induced neurotoxicity [37]. Most A $\beta$  peptides of FAD contain one point mutation of wild-type A $\beta$  [21–26]. Some of them, such as Arctic-type A $\beta$ , can cause more severe cell death than wild-type A $\beta$ . Among these familial A $\beta$  mutants, the Arctic-type A $\beta$  has been shown to accelerate the development of clinical and pathological features indistinguishable from those of sporadic AD.

To further investigate the effects of L17A/F19A mutations on A $\beta$  properties, we used the same strategy as a previous study [37] and constructed an A $\beta_{40}$ (L17A/F19A/E22G) mutant to charac-

terize and compare the related properties with the genetic Arctic mutation of A $\beta_{40}$ (E22G), which has been shown to be the most toxic FAD A $\beta$  mutant [23]. We wished to determine whether the L17A/F19A mutations can result in stable conformations and less neurotoxicity not only in wild-type A $\beta$ , but also in FAD. *In vitro* studies were used to show that the L17/F19 mutants decreased A $\beta$  aggregation and changed aggregation morphology. *In vivo* studies were used to verify neurotoxicity by using a cell viability assay. Our results show that compared to A $\beta_{40}$ (E22G), A $\beta_{40}$ (L17A/F19A/E22G) can reduce aggregation and neurotoxicity. These results demonstrate that replacement of L17 and F19 with alanine residues decreases aggregation and neurotoxicity of A $\beta_{40}$ (E22G), further suggesting that L17 and F19 are key residues in the stabilization of A $\beta$ . Our study also verifies the identification of critical residues responsible for conformational changes which may trigger the neurotoxic cascade of A $\beta_{40}$  and its genetic mutations.

## Materials and Methods

### A $\beta$ Peptide Preparation

Production of recombinant A $\beta$  peptides used the cloning protocol as previously described [38]. cDNAs of A $\beta_{40}$  were a kind gift from Professor Paul Greengard. *Escherichia coli* BL21(DE3)

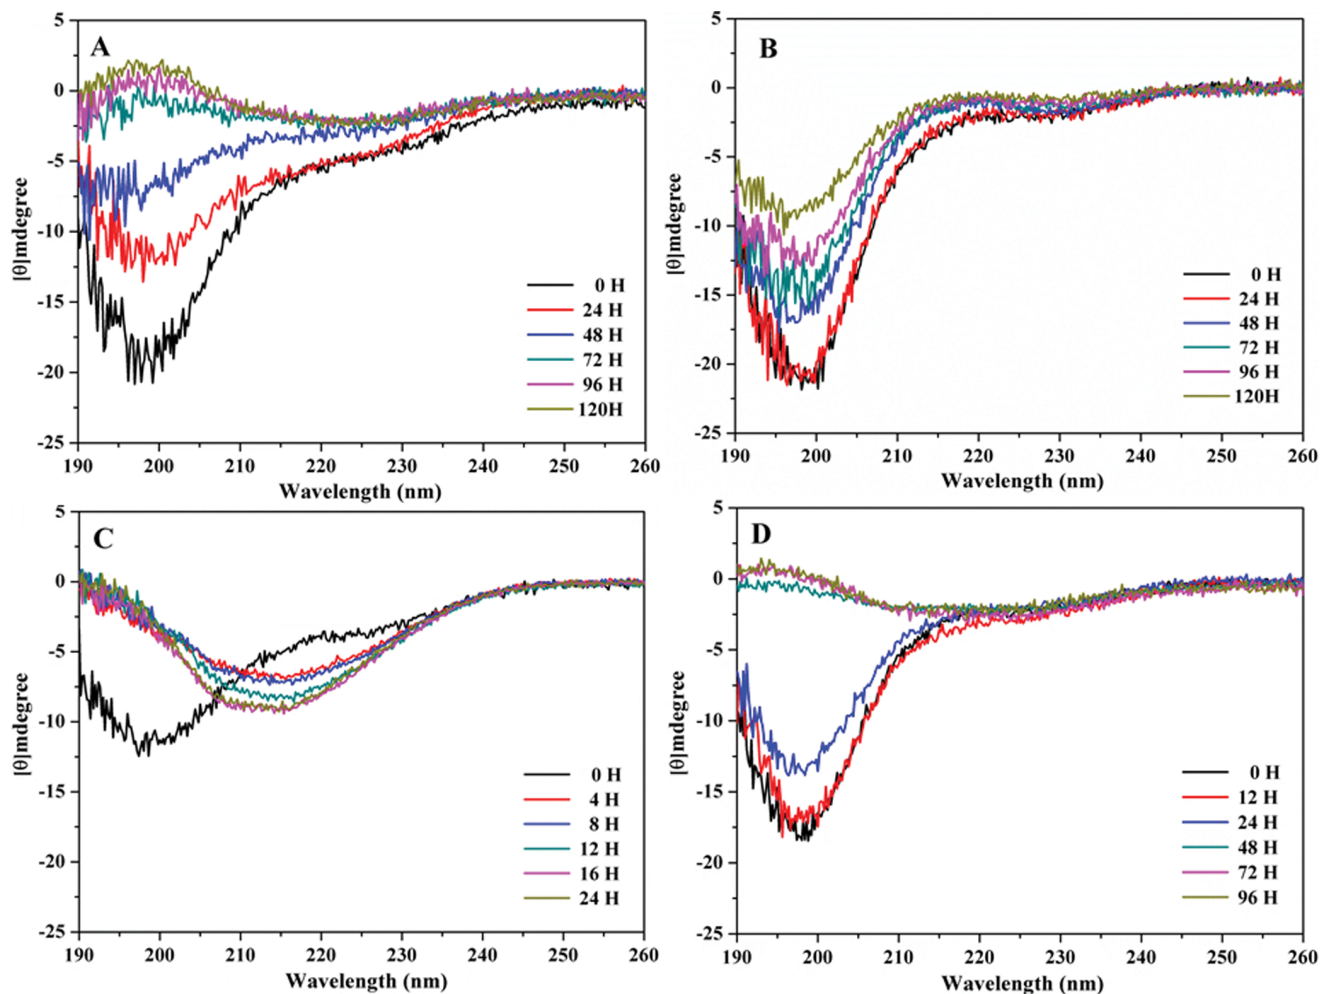

**Figure 1. Conformational changes of A $\beta_{40}$  using far ultraviolet circular dichroism spectra.** (A) A $\beta_{40}$ , (B) A $\beta_{40}$ (L17A/F19A), (C) A $\beta_{40}$ (E22G), (D) A $\beta_{40}$ (L17A/F19A/E22G) peptides at various incubated times. The concentration of A $\beta$  peptides was 60  $\mu$ M at pH 7.0 and 37°C. doi:10.1371/journal.pone.0061874.g001

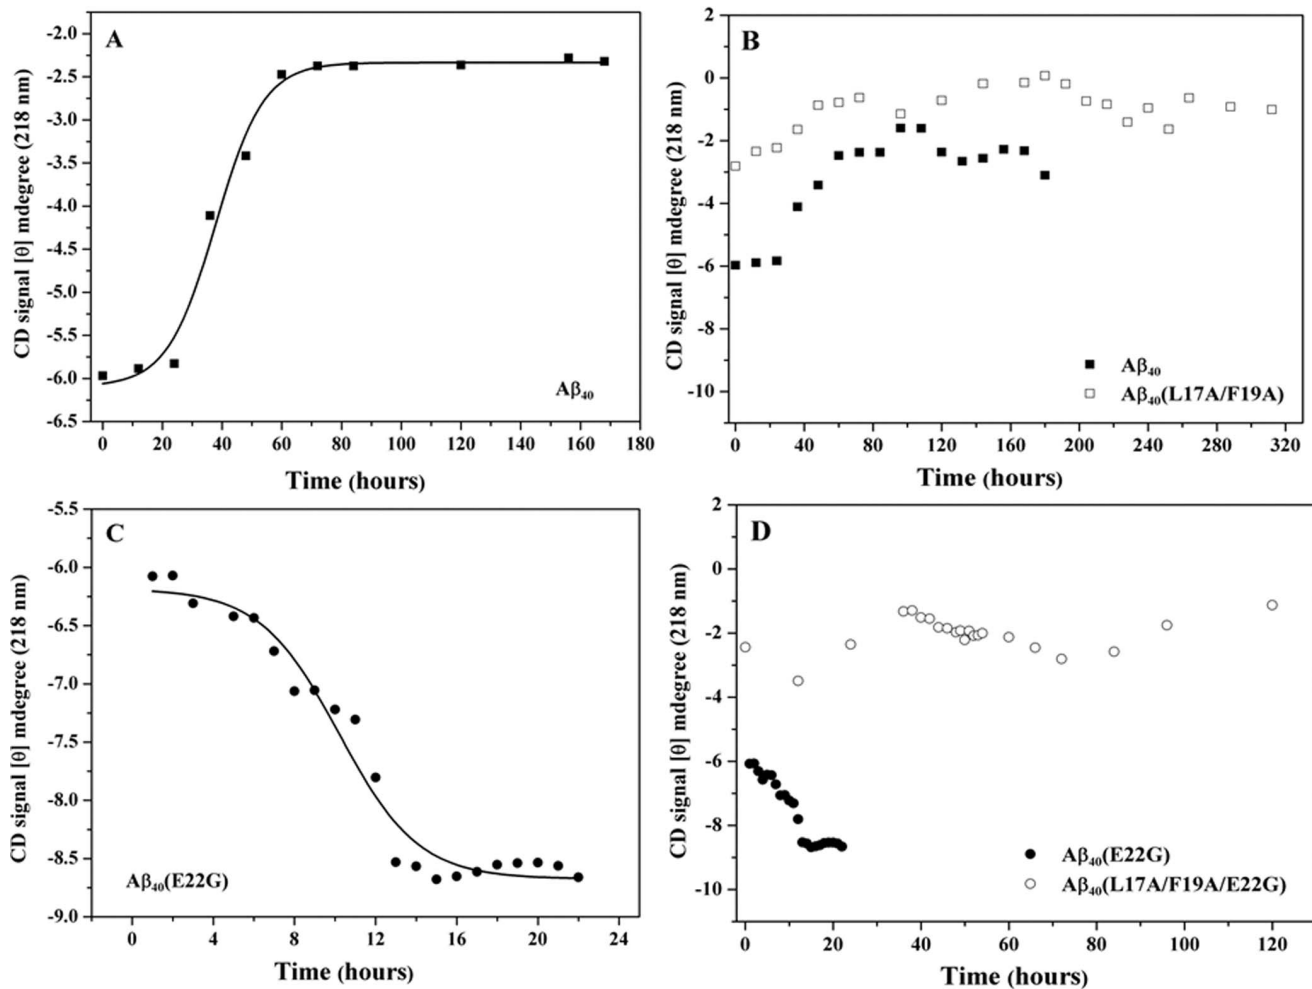

**Figure 2. Plot of molar ellipticity at 218 nm versus incubation time.** (A) Aβ<sub>40</sub> (■), (B) compare Aβ<sub>40</sub> (■) with Aβ<sub>40</sub>(L17A/F19A) (□), (C) Aβ<sub>40</sub>(E22G) (●), (D) compare Aβ<sub>40</sub>(E22G) with Aβ<sub>40</sub>(L17A/F19A/E22G) (○). doi:10.1371/journal.pone.0061874.g002

(Sigma, St. Louis, USA) was used for expression. All Aβ peptides were purified on a reverse phase C<sub>18</sub> HPLC column (Waters, Milford, Massachusetts, USA) with a linear gradient from 0% to 100% acetonitrile. The molecular weight of the purified Aβ peptides was verified by MALDI-TOF mass spectroscopy. They were freshly prepared in a 1 mM stock solution in 2,2,2-trifluoroethanol (Sigma, St. Louis, USA).

### Circular Dichroism (CD) Spectroscopy and Secondary Structure Analyses

Far-UV CD spectra were collected from 190–260 nm at 37°C using a synchrotron radiation circular dichroism (SRCD) spectropolarimeter at the 04B1 beam station of the national synchrotron radiation center in Taiwan. For SRCD measurements, a final peptide concentration of 60 μM in 20 mM phosphate buffer, pH 7.0, was used. All measurements were performed in CaF<sub>2</sub> cells with a path length of 0.1 mm. Each SRCD spectrum was reported as the average sum of three separate analyses. Secondary structure analysis was performed in an online web server Dichroweb [39,40] using the CDSSTR program.

### Thioflavin-T Peptide Aggregation Assay

The peptide stock solution was dried under N<sub>2</sub> gas and resuspended in 20 mM phosphate buffer, pH 7.0, to a final concentration of 60 μM. Thioflavin T (Th-T) (Sigma, St. Louis, USA) dye (30 μM) was added to the freshly prepared peptide solution at a molar ratio of 1:2 with 0.01% NaN<sub>3</sub> at 37°C. Fluorescence measurements were performed using a microplate reader (FlexStation 3, DOWNINGTOWN, Pennsylvania, USA) every 30 minutes at 37.0±0.2°C. The excitation and emission wavelengths were 450 nm and 482 nm, respectively.

Aggregation kinetics was fitted using the following equation:

$$Y = Y_i + m_i t + \frac{Y_f + m_f t}{1 + e^{-(t-t_0)k_{app}}} \quad (1)$$

Where Y is the fluorescence intensity, t is time, t<sub>0</sub> is the time to 50% of maximal fluorescence, and k<sub>app</sub> is apparent rate constant for the growth of fibrils [41]. Kinetic data obtained from spectroscopic measurements were fitted using the nonlinear curve fitting software Origin 8.0 (OriginLab, Northampton, MA, USA). In the initial fitting stage, the Simplex method was used to calculate the initial input parameters to establish the parameter

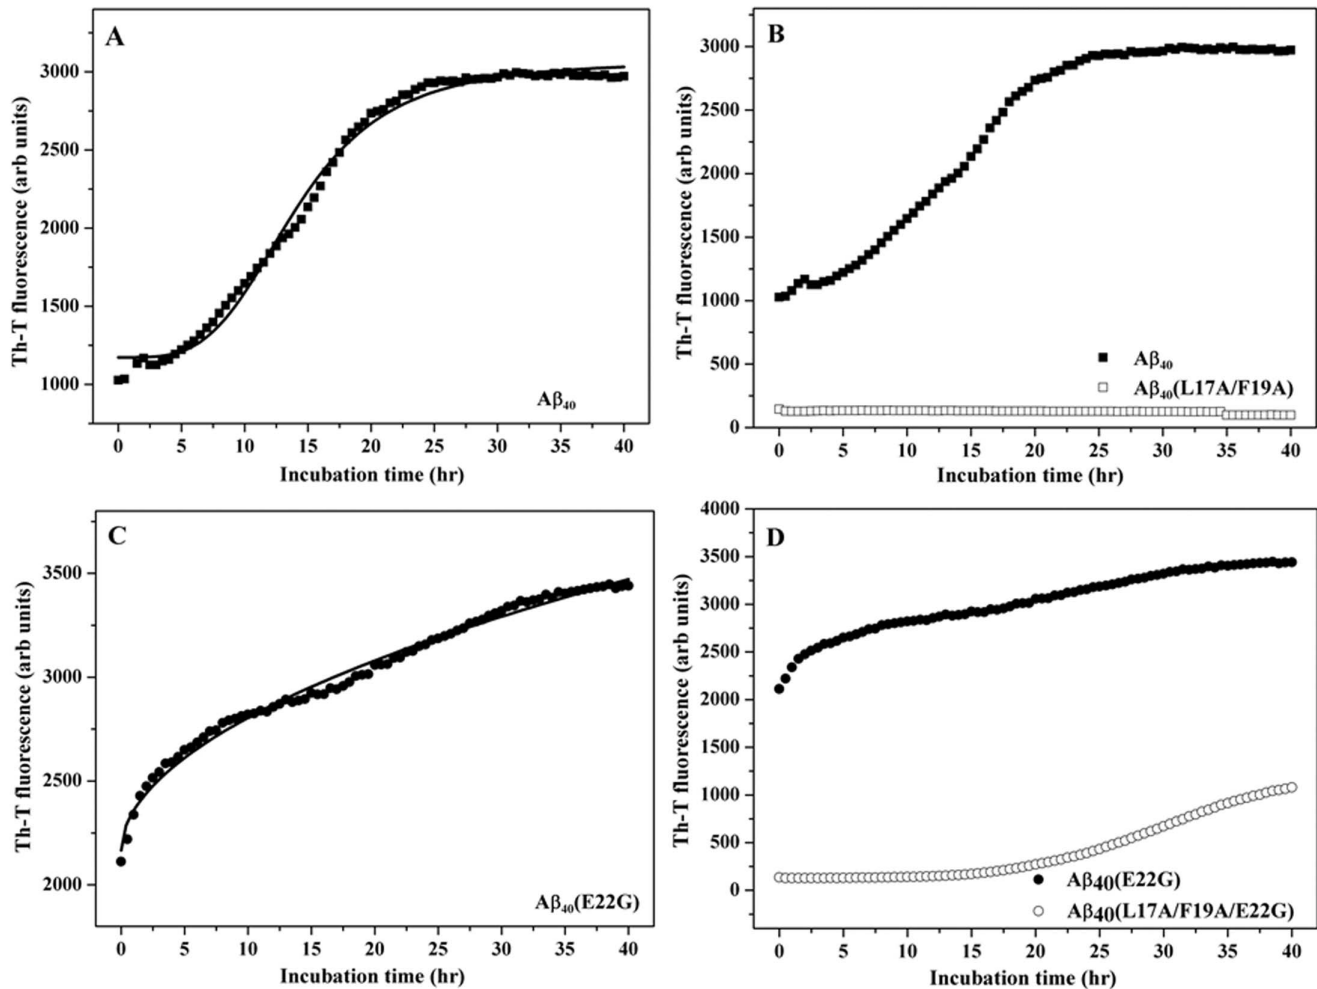

**Figure 3. Kinetics of the aggregation process.** (A) Curve fitting with A $\beta_{40}$  (■), (B) Group A $\beta_{40}$  (■) versus A $\beta_{40}$ (L17A/F19A)(□), (C) Curve fitting with A $\beta_{40}$ (E22G) (●), (D) Group A $\beta_{40}$ (E22G) (●) versus A $\beta_{40}$ (L17A/F19A/E22G) (○). The aggregation assay was performed with 60  $\mu$ M A $\beta$  peptides (A $\beta$ : Th-T = 2:1) at 37°C.

doi:10.1371/journal.pone.0061874.g003

region. These parameters were then used as constraints for further nonlinear curve fitting. A 0.95 confidence level target was set to constrain the quality of the curve fitting. The final fitting parameters were obtained when the value of  $\chi^2$  was less than 0.05, and the parameters and errors for the parameters reached a convergent and steady state.

### Western Blot Analysis of A $\beta$ Oligomers

Each A $\beta$  peptide was dissolved in phosphate buffer, pH 7.0, to a final concentration of 60  $\mu$ M, and incubated for 0, 24, 48 and 72 hours at 37°C. Then the samples were separated by 4~20%

gradient Tricine-SDS-PAGE and transferred onto a polyvinylidene difluoride (PVDF; PE, 0.22  $\mu$ m) membrane for 2 hours. The PVDF membrane was blocked using 5% nonfat milk in phosphate-buffered saline (PBS) for 1 hour and probed with primary anti-mouse monoclonal antibody (6E10, Abcam, Cambridge, UK; 1:2000 dilution) overnight at 4°C. After probing with primary antibody, the PVDF membrane was washed three times with PBST and probed with anti-mouse secondary antibody (Sigma, Poole, UK; 1:6000 dilution). The labeled A $\beta$  peptides were detected using the western lighting chemiluminescence kit (GE, Pittsburgh, USA).

**Table 1.** Calculated aggregation rates for different A $\beta$  peptides.

| Peptide                         | $K_{app}$           | $R^2$ | $\chi^2$ |
|---------------------------------|---------------------|-------|----------|
| A $\beta_{40}$                  | 14.12 $\pm$ 0.21    | 0.994 | 0.330    |
| A $\beta_{40}$ (E22G)           | 3504.20 $\pm$ 16.43 | 0.998 | 0.009    |
| A $\beta_{40}$ (L17A/F19A/E22G) | 33.96 $\pm$ 0.28    | 0.995 | 0.062    |

doi:10.1371/journal.pone.0061874.t001

### Fourier-transform Infrared Spectroscopy (FT-IR)

A FT-IR spectrometer (Jasco, FT-IR/4100) equipped with an accessory was used to study the conformation of A $\beta_{40}$  during the aggregative process. One hundred  $\mu$ l of 200  $\mu$ M A $\beta$  peptide solution was coated on a ZnSe crystal and kept dry overnight in a desiccator at room temperature. The spectra were recorded at a wavelength range of 1500–1800  $\text{cm}^{-1}$  with 1  $\text{cm}^{-1}$  intervals. The peak was identified from the first derivation of the IR spectrum in the amide I region, and the secondary structure was analyzed using Original 8.0 software.

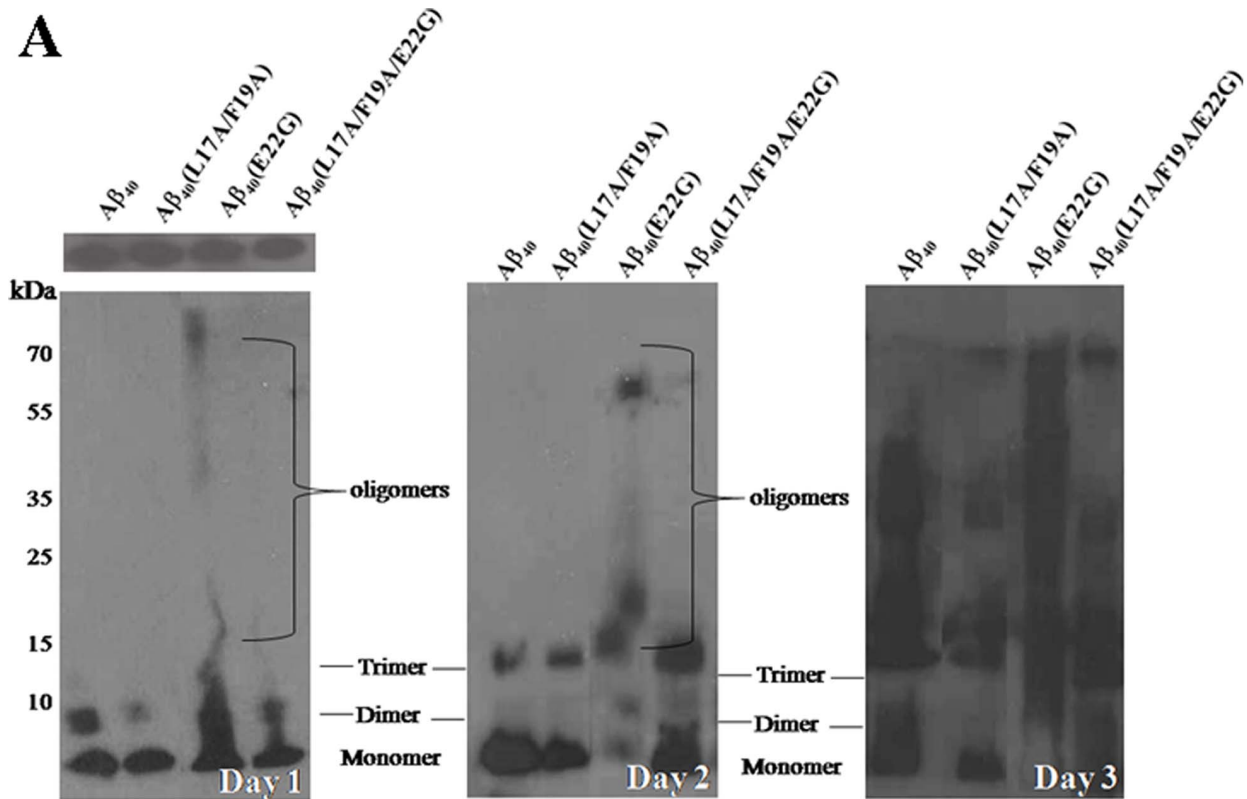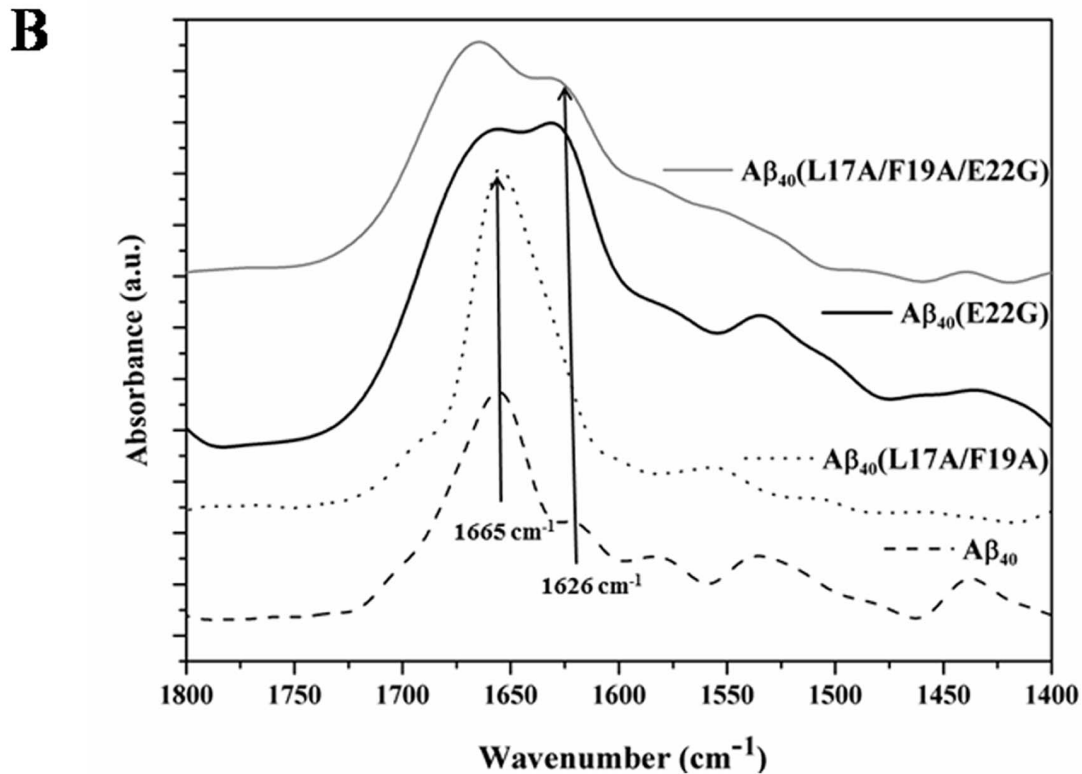

**Figure 4. Oligomerization and fibrillization of A $\beta$  peptides.** (A) Representative western blots showing oligomeric and fibrillar A $\beta$  peptides. Incubated A $\beta$  peptides at 60  $\mu\text{M}$  concentration at 37°C on day 0 (upper) and day 1, day 2 and day 3. Approximate molecular weights (in kD) determined using molecular weight markers are shown on the left-hand side. (B) FT-IR spectra of 0.2 mM A $\beta$  peptides on day 3. doi:10.1371/journal.pone.0061874.g004

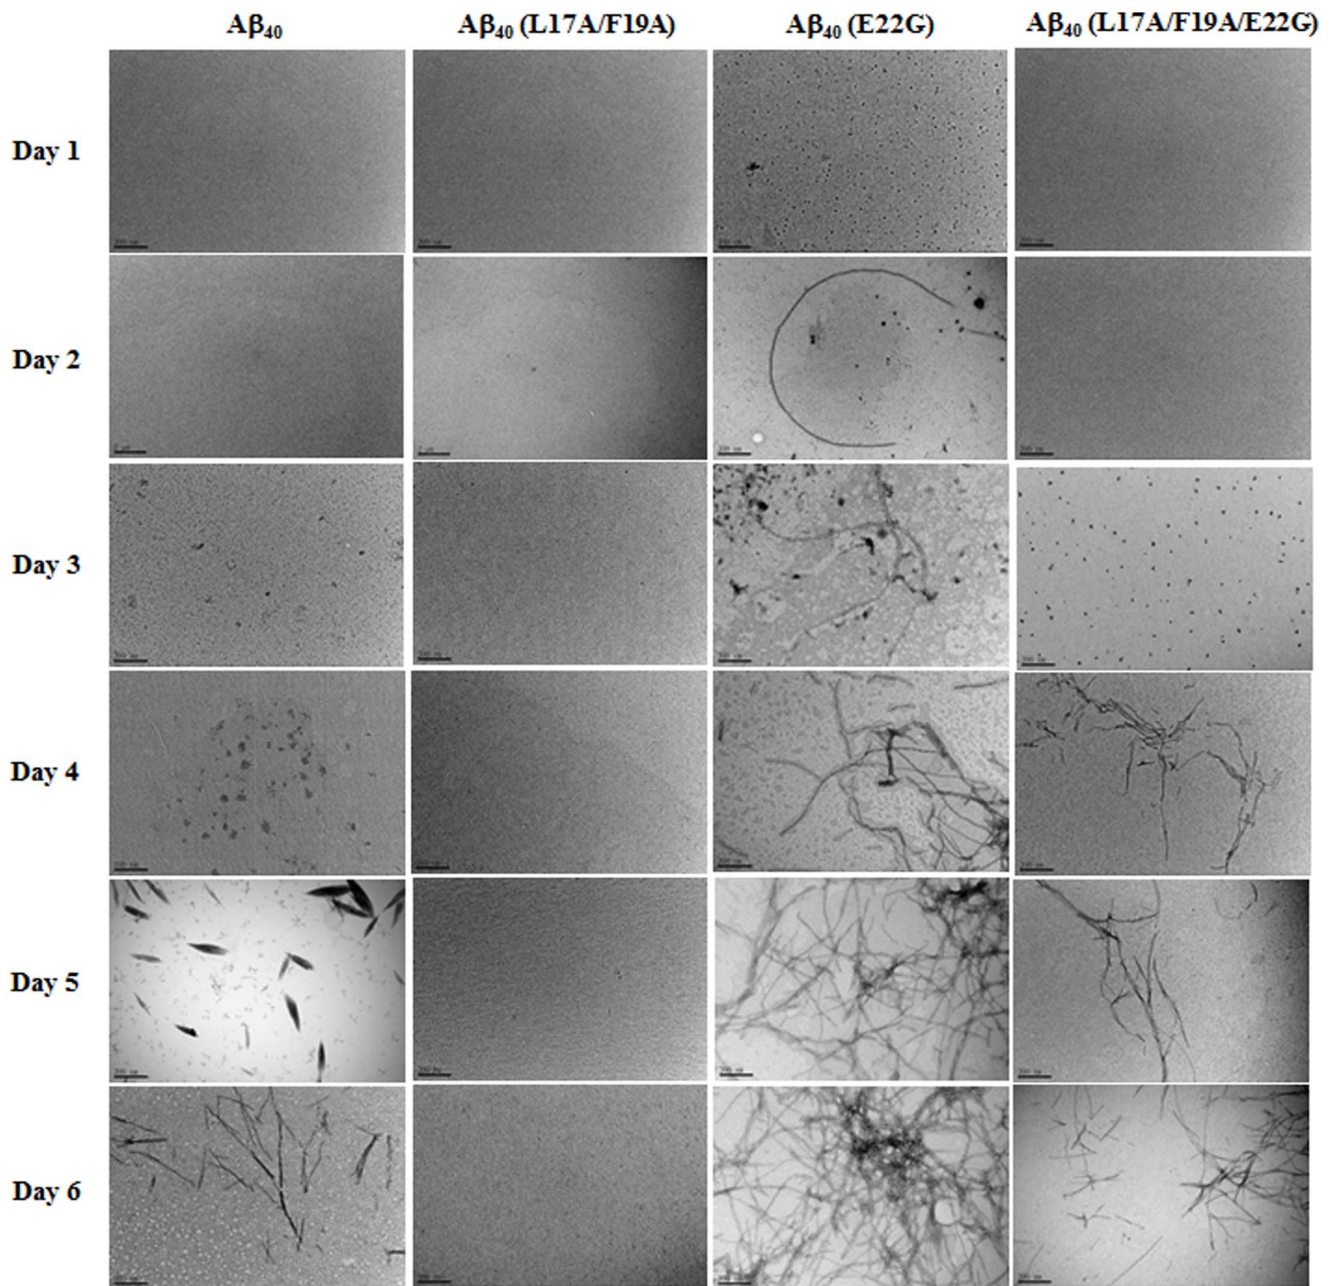

**Figure 5. Negative stained TEM images of fibrils formed by A $\beta$ s.** Fibrils formed from 60  $\mu$ M peptides in phosphate buffer, pH 7.0, 37°C on day 5. All TEM images are 200,000 $\times$  magnification. The scale bar indicates 200 nm.  
doi:10.1371/journal.pone.0061874.g005

#### Transmission Electron Microscope (TEM) Analysis

A TEM (JEM-2000 EXII, JEOL, Japan) with an accelerating voltage of 100 KeV was used to analyze the morphology of A $\beta$  peptides incubated at different time periods. Ten microliters of the A $\beta$  peptide samples used for the aggregation assay was placed onto a carbon-coated 200 mesh copper grid (Pelco, Ca, USA). Excess solution was wicked dry with tissue paper, and the sample was negatively stained with 5  $\mu$ l of 2% uranyl acetate for 30 seconds. Excess solution was wicked dry, and the grid was allowed to air dry for further TEM analysis.

#### Cell Viability Assay

Human neuroblastoma SH-SY5Y cells [42] were cultured in DMEM/F12 (1:1) supplemented (Biocrom, Berlin, Germany) with 2 mM glutamine and 10% (v/v) heat-inactivated fetal bovine serum (Biowest, Nuaille, France) at 37°C in a humidified atmosphere containing 5% CO<sub>2</sub>. Cell viability was measured using 3-(4,5-dimethylthiazol-2-yl)-2,5-diphenyl tetrazolium bromide (MTT) (Sigma, Missouri, USA). All A $\beta$  peptides were prepared as a 1 mM stock solution in trifluoroethanol. Freshly prepared stock solution was then dried under N<sub>2</sub> gas and resuspended in PBS buffer, pH 7.0, to a final peptide concentration of 500  $\mu$ M. The resulting solution was incubated at 25°C for

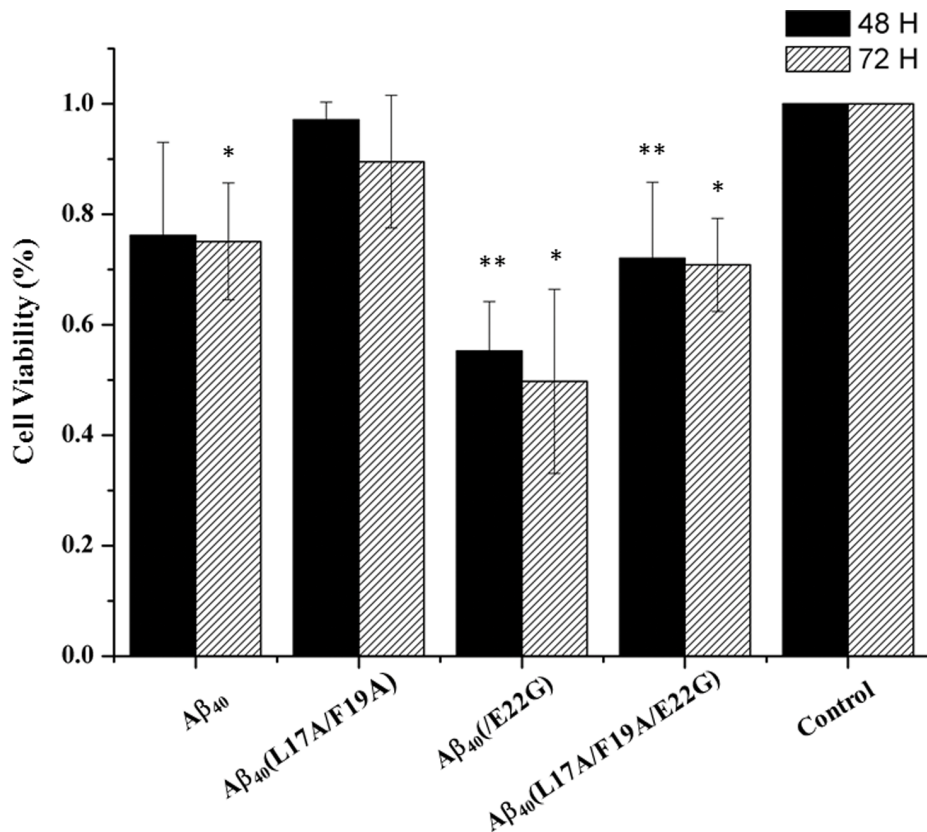

**Figure 6. Cell viability determined by the MTT assay.** Survival percentages of SHSY5Y cells incubated with 30  $\mu$ M A $\beta$ s for 72 hours. Wells containing SHSY5Y cells without A $\beta$  peptides were used as a control group. \* $p \leq 0.05$  versus control was considered statistically significant. \*\* $p \leq 0.01$ . doi:10.1371/journal.pone.0061874.g006

24 hours to obtain the A $\beta$  oligomers. This peptide solution was further diluted to 30  $\mu$ M for the viability assay.

In a 96-well microtiter plate,  $1 \times 10^4$  cells were placed in each well and incubated in the absence or presence of A $\beta$  peptides in a total volume of 100  $\mu$ l for 48 hours and 72 hours at 37°C in a humidified atmosphere containing 5% CO<sub>2</sub> before the viability assay. Ten microliters of MTT solution was added to each well and further incubated for another 4 hours at 37°C [12]. The absorbance was measured at a wavelength of 570 nm using a microplate reader (FlexStation 3).

#### Measurement of Intracellular ROS

ROS were determined using a 2',7'-dichlorofluorescein diacetate (DCFH-DA)(Sigma, St. Louis, USA) assay in a flow cytometer (Beckman Coulter, Brea, CA, USA). Cells ( $1 \times 10^5$ ) were incubated with 30  $\mu$ M of A $\beta$  peptides for 48 hours. Before conducting flow cytometry, the cells were treated with 10  $\mu$ M of DCFH-DA for 30 minutes at 37°C, followed by washing with PBS [12,13]. Data analyses were performed using program Kaluza software, version 1.2.

#### Statistical Analysis

Results were analyzed by the Student's t-Test using Original 8.0 software. Data are expressed as mean  $\pm$  standard deviation. A  $p$  value  $\leq 0.05$  was considered statistically significant.

## Results

### Structural Stability of A $\beta$ <sub>40</sub> and A $\beta$ <sub>40</sub> Mutations

The aggregation of A $\beta$  is accompanied by a conformational conversion from either helix or random coil to  $\beta$ -sheet. Therefore, the conformational state of A $\beta$  plays a critical role in its aggregation ability and toxicity. We first applied CD spectroscopy to investigate the structural state of wild-type and Arctic-type A $\beta$ <sub>40</sub>. Figure 1 (A) and (C) shows the CD spectra of wild-type A $\beta$ <sub>40</sub> and Arctic-type A $\beta$ <sub>40</sub>(E22G). From the CD spectra, it can be seen that both A $\beta$ <sub>40</sub> and Arctic-type A $\beta$ <sub>40</sub>(E22G) peptides were converted from random coil to  $\beta$ -sheet after 48 hours. The  $\beta$ -sheet conformation first appeared at 4 hours for A $\beta$ <sub>40</sub>(E22G), while for A $\beta$ <sub>40</sub>, the  $\beta$ -sheet structure was first observed later at 48 hours. Further analysis of  $\beta$ -sheet propensity (CD signal at 218 nm versus time) is shown in Figure 2 (A) and (C) for A $\beta$ <sub>40</sub> and A $\beta$ <sub>40</sub>(E22G). Intensity at 218 nm increased with increased incubation time for A $\beta$ <sub>40</sub> and A $\beta$ <sub>40</sub>(E22G), and the conversion rate of A $\beta$ <sub>40</sub>(E22G) was faster than A $\beta$ <sub>40</sub>.

### Effect of L17A and F19A on the Structural Stability of A $\beta$ <sub>40</sub> and its Mutations

Previously we replaced residues L17 and F19 with alanine, resulting in an increase in structural stability and reduction of toxicity [37]. We used the same strategy [37] to test the effect of L17A and F19A on structural stability and toxicity of the most toxic FAD mutant, Arctic-type A $\beta$  peptide [A $\beta$ <sub>40</sub>(E22G)]. Figures 1 (B) and (D) show the CD spectra for A $\beta$ <sub>40</sub>(L17A/F19A) and A $\beta$ <sub>40</sub>(L17A/F19A/E22G). Only A $\beta$ <sub>40</sub>(L17A/F19A/E22G) was

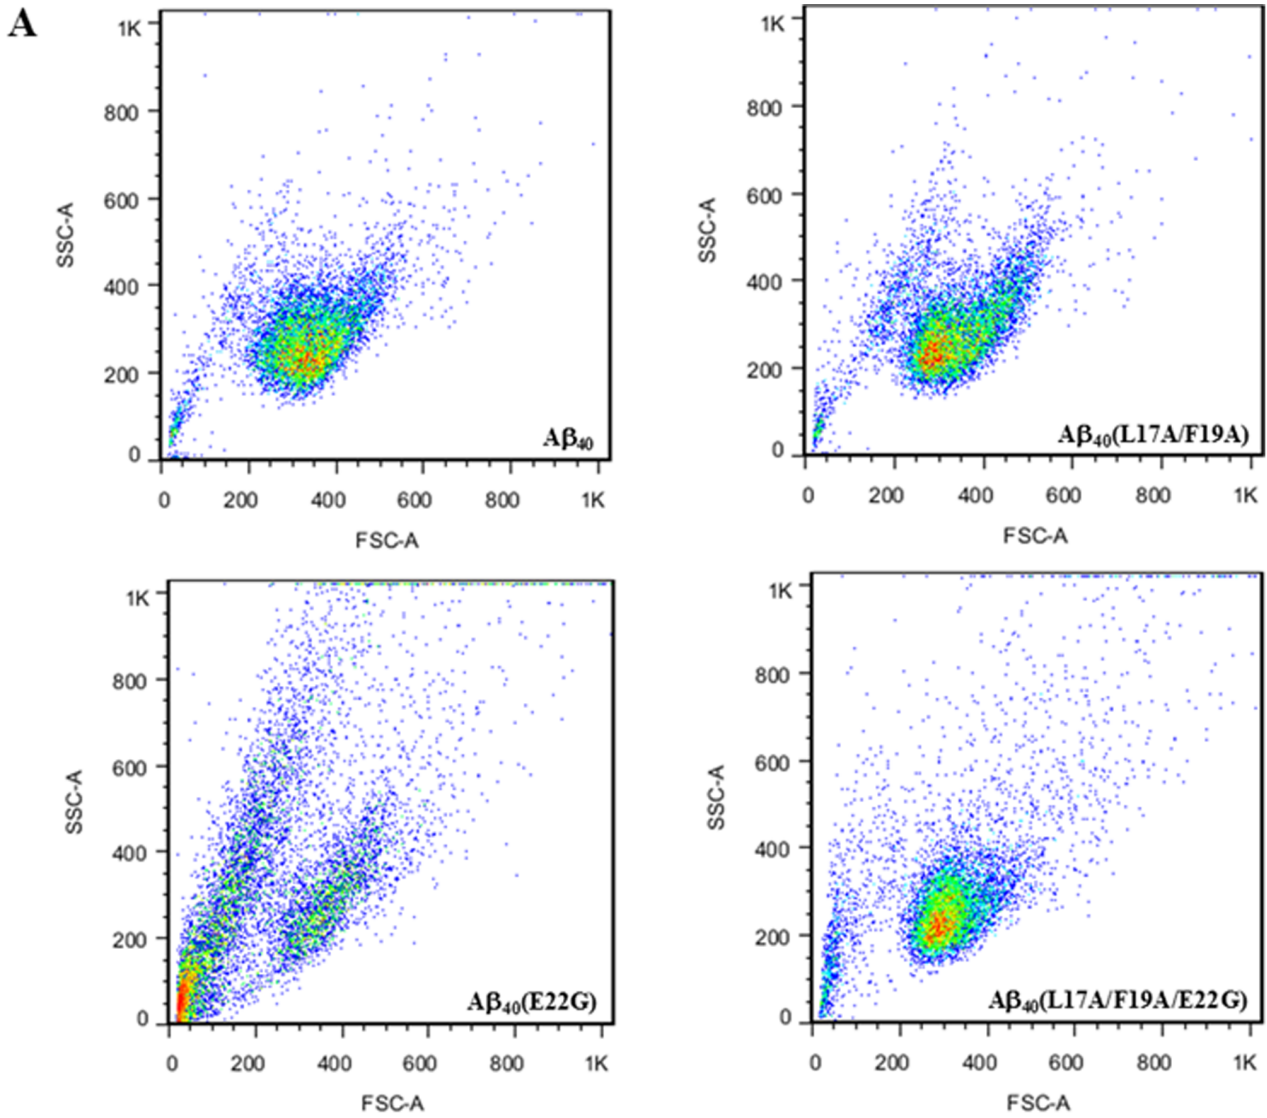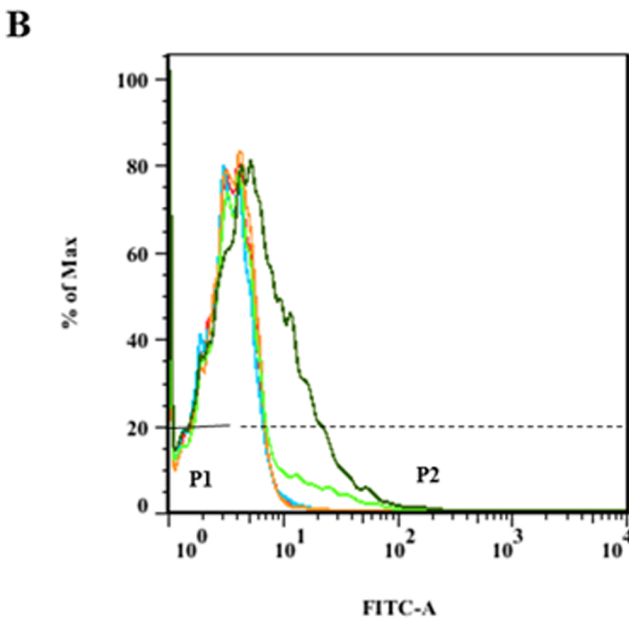

| Peptides                        | Events           | P 1<br>(% parent) | P 2<br>(% parent) |
|---------------------------------|------------------|-------------------|-------------------|
| Control                         | 4040<br>(40.4%)  | 5781<br>(57.8%)   |                   |
| A $\beta_{40}$                  | 1698<br>(17.0 %) | 8245<br>(82.4 %)  |                   |
| A $\beta_{40}$ (L17A/F19A)      | 1906<br>(19.0 %) | 8004<br>(80.0 %)  |                   |
| A $\beta_{40}$ (E22G)           | 1471<br>(14.7 %) | 8485<br>(84.5 %)  |                   |
| A $\beta_{40}$ (L17A/F19A/E22G) | 2225<br>(22.2 %) | 7704<br>(77.0 %)  |                   |



**Figure 7. Formation of reactive oxygen species (ROS) by SHSY5Y cells.** (A) Flow cytometry after DCFH-DA staining to measure ROS production of cells treated with 30  $\mu$ M A $\beta$  peptides for 48 hours. (B) Total cells are 10000 events. P1 and P2 populations are compared with control cells without peptide (red). The histogram showing A $\beta$ <sub>40</sub> is blue, A $\beta$ <sub>40</sub>(L17A/F19A) is orange, A $\beta$ <sub>40</sub>(E22G) is green, and A $\beta$ <sub>40</sub>(L17A/F19A/E22G) is olive. doi:10.1371/journal.pone.0061874.g007

converted from random coil to  $\beta$ -sheet [Figure 1 (D)] after 72 hours, while A $\beta$ <sub>40</sub>(L17A/F19A) remained largely in a random coiled state over a 120-hour period [Figure 1 (B)].

A plot of  $\beta$ -sheet propensity (CD signal at 218 nm vs. time) for A $\beta$ <sub>40</sub>(L17A/F19A) and A $\beta$ <sub>40</sub>(L17A/F19A/E22G) is shown in Figure 2 (B) and (D). Compared to the  $\beta$ -sheet propensity of A $\beta$ <sub>40</sub> and A $\beta$ <sub>40</sub>(E22G), the  $\beta$ -sheet propensity for A $\beta$ <sub>40</sub>(L17A/F19A) and A $\beta$ <sub>40</sub>(L17A/F19A/E22G) was lower. The  $\beta$ -sheet conversion rate of A $\beta$ <sub>40</sub>(L17A/F19A) and A $\beta$ <sub>40</sub>(L17A/F19A/E22G) was slower than those of A $\beta$ <sub>40</sub> and A $\beta$ <sub>40</sub>(E22G), suggesting that replacement of L17 and F19 with alanine increased the conformational stability of A $\beta$ , even for Arctic-type A $\beta$ <sub>40</sub>(E22G). Taken together, the results demonstrated that A $\beta$ <sub>40</sub>(E22G) underwent the fastest transition. The rate of conformation conversion was the order, A $\beta$ <sub>40</sub> (E22G) > A $\beta$ <sub>40</sub> > A $\beta$ <sub>40</sub> (L17A/F19A/E22G) >> A $\beta$ <sub>40</sub> (L17A/F19A).

### Aggregation Kinetics of the A $\beta$ Peptide

We further investigated the aggregation kinetics for A $\beta$ <sub>40</sub>, A $\beta$ <sub>40</sub>(E22G), A $\beta$ <sub>40</sub>(L17A/F19A), and A $\beta$ <sub>40</sub>(L17A/F19A/E22G). Figure 3 (A), (B), (C), and (D) show the aggregation process for wild-type A $\beta$ <sub>40</sub>, A $\beta$ <sub>40</sub>(L17A/F19A), Arctic-type A $\beta$ <sub>40</sub>(E22G), and A $\beta$ <sub>40</sub>(L17A/F19A/E22G) using the Th-T binding assay. Solid lines show the best fit curves using equation (1). The aggregation process of A $\beta$ <sub>40</sub>(L17A/F19A) as shown in Figure 3 (B) contained a lag phase through the whole incubation period, suggesting that the aggregation ability of A $\beta$ <sub>40</sub>(L17A/F19A) was reduced compared to that of wild-type A $\beta$ <sub>40</sub>. Furthermore, the Th-T intensity of A $\beta$ <sub>40</sub>(E22G) at the origin point was higher than that of others [Figure 3 (C)], and the aggregation profile of Arctic-type A $\beta$ <sub>40</sub>(E22G) was most likely a hyperbolic curve instead of the typical sigmoidal curve.

Under the same conditions, the aggregation profiles of A $\beta$ <sub>40</sub> and A $\beta$ <sub>40</sub>(L17A/F19A/E22G) [Figure 3 (B) and (D)] were the typical sigmoidal shape, although the aggregation profile of A $\beta$ <sub>40</sub> lacked the nucleation stage. The results show that both A $\beta$ <sub>40</sub> and A $\beta$ <sub>40</sub>(L17A/F19A/E22G) underwent typical nucleation-dependent aggregation processes. This demonstrates that, similar to A $\beta$ <sub>40</sub>(L17A/F19A), alanine replacement of L17 and F19 can reduce the aggregation rate of Arctic-type A $\beta$ <sub>40</sub>(E22G). In Table 1, the aggregation rate of A $\beta$ <sub>40</sub>(E22G) is 200-fold higher than that of A $\beta$ <sub>40</sub> and A $\beta$ <sub>40</sub>(L17A/F19A/E22G), indicating that the aggregation of Arctic-type A $\beta$ <sub>40</sub>(E22G) was faster than other A $\beta$ <sub>40</sub> peptides and may have undergone a nucleation-dependent polymerization.

### Molecular State of A $\beta$ Peptides

We further examined the molecular state of A $\beta$ s using western blot analysis. Figure 4 (A) shows the blot of Arctic-type A $\beta$ <sub>40</sub>(E22G) and other A $\beta$ <sub>40</sub> peptides at day 0, day 1, day 2, and day 3. Consistent with the aggregation profiles, A $\beta$ <sub>40</sub>(E22G) aggregated into more severe polymorphologies than other A $\beta$ <sub>40</sub> peptides. Compared with A $\beta$ <sub>40</sub>, A $\beta$ <sub>40</sub>(L17A/F19A), and A $\beta$ <sub>40</sub>(L17A/F19A/E22G), A $\beta$ <sub>40</sub>(E22G) showed a smeared band at day 1 in the western blot. This phenomenon even becomes obvious at day 3 for A $\beta$ <sub>40</sub>(E22G). For A $\beta$ <sub>40</sub>(L17A/F19A), the aggregation profile was less obvious, even at day 2 when western blotting showed slight smearing. The aggregation profiles for A $\beta$ <sub>40</sub> and A $\beta$ <sub>40</sub>(L17A/F19A/E22G) were approximately similar.

The structural state of these A $\beta$ <sub>40</sub> peptides at day 3 was further confirmed using FT-IR spectra. The FT-IR spectrum area from 1400–1800  $\text{cm}^{-1}$  were curve fitted to determine the status of possible  $\beta$ -sheet, random coil, and  $\alpha$ -helix structures [43]. The spectrum area of  $\beta$ -sheet/aggregated is at 1610–1640  $\text{cm}^{-1}$  and  $\alpha$ -helix/unordered is at 1660–1685  $\text{cm}^{-1}$  [14]. As shown in Figure 4 (B), the 1665  $\text{cm}^{-1}$  peak of A $\beta$ <sub>40</sub>(E22G) showed a significant shift to a 1626  $\text{cm}^{-1}$  peak, while for A $\beta$ <sub>40</sub>(L17A/F19A), the 1665  $\text{cm}^{-1}$  peak of A $\beta$ <sub>40</sub>(E22G) did not shift to this wavelength. The shift of the 1665  $\text{cm}^{-1}$  peak to 1626  $\text{cm}^{-1}$  for A $\beta$ <sub>40</sub> and A $\beta$ <sub>40</sub>(L17A/F19A/E22G) was less obvious than that of A $\beta$ <sub>40</sub>(E22G). Taken together, the results confirmed that A $\beta$ <sub>40</sub>(E22G) aggregates more than other A $\beta$ <sub>40</sub> peptides. These results also show that L17 and F19 mutants can reduce the rate of aggregation.

### TEM Morphology of A $\beta$ Fibrils

Figure 5 shows the results of TEM for A $\beta$ <sub>40</sub>, A $\beta$ <sub>40</sub>(L17A/F19A), A $\beta$ <sub>40</sub>(E22G), and A $\beta$ <sub>40</sub>(L17A/F19A/E22G) from day 1 to day 6. TEM morphologies of A $\beta$ <sub>40</sub>, A $\beta$ <sub>40</sub>(E22G), and A $\beta$ <sub>40</sub>(L17A/F19A/E22G) were all aggregated into fibrils. In contrast, no fibrils were observed for A $\beta$ <sub>40</sub>(L17A/F19A), even at day 6. The Arctic-type A $\beta$ <sub>40</sub>(E22G) was the fastest to form fibrils at day 2, A $\beta$ <sub>40</sub>(L17A/F19A/E22G) formed fibrils at day 4, while wild-type A $\beta$ <sub>40</sub> did not form obvious fibrils until day 5. This is consistent with aggregation characterized by the other assays. The morphologic study clearly demonstrated that replacement of L17 and F19 with alanine reduced the aggregation ability of wild-type A $\beta$ <sub>40</sub> and Arctic-type A $\beta$ <sub>40</sub>(E22G).

### Cell Viability

As shown previously in this report, replacement of L17 and F19 with alanine reduced the aggregation ability and stabilized the conformation for not only wild-type A $\beta$ <sub>40</sub>, but also for Arctic-type A $\beta$ <sub>40</sub>(E22G). Because the conformational state and aggregation ability are linked with toxicity, the effects of L17 and F19 on toxicity induced by Arctic-type A $\beta$ <sub>40</sub>(E22G) was further investigated. Comparative cell viability of A $\beta$ <sub>40</sub> peptides, including wild-type A $\beta$ <sub>40</sub>, A $\beta$ <sub>40</sub>(L17A/F19A), Arctic-type A $\beta$ <sub>40</sub>(E22G), and A $\beta$ <sub>40</sub>(L17A/F19A/E22G), was studied as shown in Figure 6. The results show the comparative cell viabilities after treatment with 30  $\mu$ M of A $\beta$ <sub>40</sub>, A $\beta$ <sub>40</sub>(L17A/F19A), Arctic-type A $\beta$ <sub>40</sub>(E22G), and A $\beta$ <sub>40</sub>(L17A/F19A/E22G) peptides at 48 hours and 72 hours. Both at 48 hours and 72 hours, the toxicity induced by A $\beta$ <sub>40</sub>(E22G) was more severe than with other peptides. Similar to a previous study [37], A $\beta$ <sub>40</sub>(L17A/F19A) showed less toxicity than other peptides. However, toxicity induced by A $\beta$ <sub>40</sub>(L17A/F19A/E22G) was approximately the same as A $\beta$ <sub>40</sub>, suggesting that alanine replacement of L17 and F19 reduced the cytotoxicity induced by A $\beta$ <sub>40</sub>(E22G), which is consistent with the aggregation rate and structural stability. Cell viability at 48 hours and 72 hours was on the order of A $\beta$ <sub>40</sub>(L17A/F19A) > A $\beta$ <sub>40</sub>(L17A/F19A/E22G) = A $\beta$ <sub>40</sub> > A $\beta$ <sub>40</sub>(E22G).

### Effect of A $\beta$ on ROS

Excessive ROS generation from dysfunctional or damaged mitochondria may trigger autophagy which removes the damaged mitochondria [44]. Flow cytometry shows that the rate of cell death was greatest for Arctic-type A $\beta$ <sub>40</sub>(E22G) [Figure 7(A)],

which was consistent with the cell viability assay. Flow cytometry also showed that treatment with A $\beta$ <sub>40</sub>(L17A/F19A/E22G) resulted in decreased ROS production (Figure 7(B)), and that treatment with Arctic-type A $\beta$ <sub>40</sub>(E22G) resulted in higher ROS that caused cell death faster than A $\beta$ <sub>40</sub>(L17A/F19A/E22G). The same results were obtained for wild-type and A $\beta$ <sub>40</sub>(L17A/F19A) [Figure 7(B)]. Together, the results indicated that L17A/F19A mutants could reduce ROS-induced oxidative DNA damage which could cause cell death.

## Discussion

Aggregation and toxicity of A $\beta$  is highly correlated with its conformational states. Conformational change is a key step in the A $\beta$ -aggregation cascade, during which the conformation of A $\beta$  undergoes a structural conversion from either  $\alpha$ -helix or random coil to  $\beta$ -sheet [15,16]. Numerous studies have shown that prevention of conformational change can reduce A $\beta$  aggregation. Furthermore, there have been many studies to elucidate the contribution of individual amino acid residues to helix stabilization [18,30]. The effects of amino acid sequence variations on the conformational change of A $\beta$  may provide useful information for further understanding the molecular mechanism of A $\beta$  aggregation.

Previous study has shown that L18A/F19A/F20A mutant can stabilize  $\alpha$ -helix conformation [30,31,33,34]. Interestingly, our previous study identified that the amino acids L17 and F19 play a key role in the stabilization of the A $\beta$ <sub>40</sub> conformation, leading to the reduction of its aggregation and cytotoxicity [37]. Therefore, we would further test the effects of L17 and F19 on the conformation, aggregation, and toxicity of other A $\beta$ <sub>40</sub> mutants. We used the same methodologies as the previous study, constructing a rational mutation A $\beta$ <sub>40</sub>(L17A/F19A/E22G) of Arctic-type A $\beta$ <sub>40</sub>(E22G), and studied its conformation, aggregation ability, and cytotoxicity.

Although, unlike A $\beta$ <sub>40</sub>(L17A/F19A), where alanine replacement of L17 and F19 of wild-type A $\beta$ <sub>40</sub> could completely inhibit the aggregation and toxicity, the rate of conformation conversion, aggregation ability, and toxicity of A $\beta$ <sub>40</sub>(L17A/F19A/E22G) were greatly reduced in comparison with those of Arctic-type A $\beta$ <sub>40</sub>(E22G), which is known to be the most toxic FAD species. Interestingly, regarding the rate of conformation conversion, aggregation ability, and induced neurotoxicity, the related properties of A $\beta$ <sub>40</sub>(L17A/F19A/E22G) were approximately the same as wild-type A $\beta$ <sub>40</sub>. Previously, several studies have shown that A $\beta$  aggregation can be blocked by helix inducing reagents, such as trifluoroethanol and sodium dodecyl sulfate [45]. Moreover, it has been shown that residues 16–23 have been predicted as the region of discordant helix [30–34], and any factors which stabilize the conformation of this discordant helix region could prevent the aggregation of A $\beta$ <sub>40</sub>. Our previous study identified 17–25 as the discordant helix region [36]. In another study we reported that instead of V18, F19, and F20, only L17 and F19 may be enough to stabilize the conformation of A $\beta$ <sub>40</sub> and inhibit its aggregation, showing that residues L17/F19 are

important residues that can significantly increase the helical potential [37]. In the present study, we further demonstrated that residues L17 and F19 play crucial roles in the stabilization of A $\beta$ <sub>40</sub> structure. This is consistent with the hypothesis of discordant helix that residues 17–20 constitute the most sensible region for environmental changes, playing an important role in the conformational stabilization of not only A $\beta$ <sub>40</sub>, but also other mutants such as A $\beta$ <sub>40</sub>(E22G).

Beta-amyloid can cause cell death through the well-known process of oxidative stress. This process is an imbalance between the systemic manifestations of RNS and ROS [12,13]. Many neurodegenerative diseases have high levels of oxidative stress, especially those affected by ROS. Our present results showed that treatment with Arctic-type A $\beta$ <sub>40</sub>(E22G) results in more ROS than A $\beta$ <sub>40</sub>(L17A/F19A/E22G). We also showed that treatment with A $\beta$ <sub>40</sub>(L17A/F19A/E22G) can reduce ROS production to a level approximately equal to that produced by A $\beta$ <sub>40</sub>. These results again demonstrate that L17 and F19 are important residues in the reduction of cytotoxicity.

The amyloidogenic differences between A $\beta$ <sub>40</sub>(L17A/F19A) and A $\beta$ <sub>40</sub>(L17A/F19A/E22G) further indicate that the propensity of the discordant helix is highly dependent on the sequence, because the inhibition ability of L17A/F19A on aggregation and toxicity of A $\beta$ <sub>40</sub>(L17A/F19A/E22G) was weaker than that of A $\beta$ <sub>40</sub>(L17A/F19A). This is obviously affected by the E22G mutation. Mutation of E22 with G22 may increase the propensity of the discordant helix of Arctic-type A $\beta$ <sub>40</sub>(E22G) in a stronger manner than that of wild-type A $\beta$ <sub>40</sub>. This provides a possible explanation why Arctic-type A $\beta$ <sub>40</sub>(E22G) is more toxic than wild-type Arctic-type A $\beta$ <sub>40</sub>, because replacement of glutamate with glycine may increase the hydrophobicity. Therefore the helix propensity is less stable for the discordant helix region of A $\beta$ <sub>40</sub>(E22G), and as a consequence, Arctic-type A $\beta$ <sub>40</sub>(E22G) more easily aggregates and is more toxic than wild-type A $\beta$ <sub>40</sub>. In conclusion, our results confirm that the discordant helix region of A $\beta$  is located at residues 17–25, which is sensitive to environmental changes. Furthermore, our study further demonstrates that residues L17 and F19 of this discordant helix may play a crucial role in the stabilization of A $\beta$  conformation. Changes such as alanine replacement of L17 and F19 may stabilize the conformation, to diminish aggregation and reduce the neurotoxicity of A $\beta$ <sub>40</sub> and even A $\beta$ <sub>40</sub>(E22G). Thus, our results provide important information about structural parameters involved in the A $\beta$ -aggregation cascade.

## Acknowledgments

The authors wish to thank the support from National Synchrotron Radiation Center for providing the SRCD spectroscopy (04B1).

## Author Contributions

Conceived and designed the experiments: YRC THL YCC. Performed the experiments: YRC CJL CCW. Analyzed the data: YRC THL YCC. Contributed reagents/materials/analysis tools: HBH LKH HTL MSS THL YCC. Wrote the paper: YRC THL YCC.

## References

- Selkoe DJ (1991) Amyloid protein and Alzheimer's disease. *Scientific American* 265: 68–71, 74–66, 78.
- Holtzman DM, Mobley WC (1991) Molecular studies in Alzheimer's disease. *Trends in biochemical sciences* 16: 140–144.
- Standaert DG, Lee VM, Greenberg BD, Lowery DE, Trojanowski JQ (1991) Molecular features of hypothalamic plaques in Alzheimer's disease. *The American journal of pathology* 139: 681–691.
- Chui HC, Teng EL, Henderson VV, Moy AC (1985) Clinical subtypes of dementia of the Alzheimer type. *Neurology* 35: 1544–1550.
- Mucke L (2009) Neuroscience: Alzheimer's disease. *Nature* 461: 895–897.
- Bekris LM, Yu CE, Bird TD, Tsuang DW (2010) Genetics of Alzheimer disease. *Journal of geriatric psychiatry and neurology* 23: 213–227.
- Behrouz N, Defossez A, Delacourte A, Mazzuca M (1991) The immunohistochemical evidence of amyloid diffuse deposits as a pathological hallmark in Alzheimer's disease. *Journal of gerontology* 46: B209–212.
- Vassar R, Bennett BD, Babu-Khan S, Kahn S, Mendiaz EA, et al. (1999) Beta-secretase cleavage of Alzheimer's amyloid precursor protein by the transmembrane aspartic protease BACE. *Science* 286: 735–741.

9. De Strooper B, Vassar R, Golde T (2010) The secretases: enzymes with therapeutic potential in Alzheimer disease. *Nature reviews Neurology* 6: 99–107.
10. Fawzi NL, Kohlstedt KL, Okabe Y, Head-Gordon T (2008) Protofibril assemblies of the arctic, Dutch, and Flemish mutants of the Alzheimer's Abeta1–40 peptide. *Biophysical journal* 94: 2007–2016.
11. Yankner BA, Lu T (2009) Amyloid beta-protein toxicity and the pathogenesis of Alzheimer disease. *The Journal of biological chemistry* 284: 4755–4759.
12. Wang H, Xu Y, Yan J, Zhao X, Sun X, et al. (2009) Acteoside protects human neuroblastoma SH-SY5Y cells against beta-amyloid-induced cell injury. *Brain research* 1283: 139–147.
13. Mei Z, Yan P, Situ B, Mou Y, Liu P (2012) Cryptotanshinone inhibits beta-amyloid aggregation and protects damage from beta-amyloid in SH-SY5Y cells. *Neurochemical research* 37: 622–628.
14. Ahmed M, Davis J, Aucoin D, Sato T, Ahuja S, et al. (2010) Structural conversion of neurotoxic amyloid-beta(1–42) oligomers to fibrils. *Nature structural & molecular biology* 17: 561–567.
15. Kirkitadze MD, Condrion MM, Teplow DB (2001) Identification and characterization of key kinetic intermediates in amyloid beta-protein fibrillogenesis. *Journal of molecular biology* 312: 1103–1119.
16. Xu Y, Shen J, Luo X, Zhu W, Chen K, et al. (2005) Conformational transition of amyloid beta-peptide. *Proceedings of the National Academy of Sciences of the United States of America* 102: 5403–5407.
17. Bitan G, Kirkitadze MD, Lomakin A, Vollers SS, Benedek GB, et al. (2003) Amyloid beta -protein (Abeta) assembly: Abeta 40 and Abeta 42 oligomerize through distinct pathways. *Proceedings of the National Academy of Sciences of the United States of America* 100: 330–335.
18. Liao MQ, Tzeng YJ, Chang LY, Huang HB, Lin TH, et al. (2007) The correlation between neurotoxicity, aggregative ability and secondary structure studied by sequence truncated Abeta peptides. *FEBS letters* 581: 1161–1165.
19. Liu R, McAllister C, Lyubchenko Y, Sierks MR (2004) Residues 17–20 and 30–35 of beta-amyloid play critical roles in aggregation. *Journal of neuroscience research* 75: 162–171.
20. Goedert M, Spillantini MG (2006) A century of Alzheimer's disease. *Science* 314: 777–781.
21. Hendriks L, van Duijn CM, Cras P, Cruts M, Van Hul W, et al. (1992) Presenile dementia and cerebral haemorrhage linked to a mutation at codon 692 of the beta-amyloid precursor protein gene. *Nature genetics* 1: 218–221.
22. Kamino K, Orr HT, Payami H, Wijsman EM, Alonso ME, et al. (1992) Linkage and mutational analysis of familial Alzheimer disease kindreds for the APP gene region. *American journal of human genetics* 51: 998–1014.
23. Nilsson C, Westlind-Danielsson A, Eckman CB, Condrion MM, Axelman K, et al. (2001) The 'Arctic' APP mutation (E693G) causes Alzheimer's disease by enhanced Abeta protofibril formation. *Nature neuroscience* 4: 887–893.
24. Nante R, Maat-Schieman ML, Haan J, Bornebroek M, Roos RA, et al. (2001) Dementia in hereditary cerebral hemorrhage with amyloidosis-Dutch type is associated with cerebral amyloid angiopathy but is independent of plaques and neurofibrillary tangles. *Annals of neurology* 50: 765–772.
25. Szczesna-Cordary D, Guzman G, Zhao J, Hernandez O, Wei J, et al. (2005) The E22K mutation of myosin RLC that causes familial hypertrophic cardiomyopathy increases calcium sensitivity of force and ATPase in transgenic mice. *Journal of cell science* 118: 3675–3683.
26. Grabowski TJ, Cho HS, Vonsattel JP, Rebeck GW, Greenberg SM (2001) Novel amyloid precursor protein mutation in an Iowa family with dementia and severe cerebral amyloid angiopathy. *Annals of neurology* 49: 697–705.
27. Murakami K, Irie K, Morimoto A, Ohigashi H, Shindo M, et al. (2002) Synthesis, aggregation, neurotoxicity, and secondary structure of various A beta 1–42 mutants of familial Alzheimer's disease at positions 21–23. *Biochemical and biophysical research communications* 294: 5–10.
28. Peralvarez-Marín A, Mateos L, Zhang C, Singh S, Cedazo-Minguez A, et al. (2009) Influence of residue 22 on the folding, aggregation profile, and toxicity of the Alzheimer's amyloid beta peptide. *Biophysical journal* 97: 277–285.
29. Norlin N, Hellberg M, Filippov A, Sousa AA, Grobner G, et al. (2012) Aggregation and fibril morphology of the Arctic mutation of Alzheimer's Abeta peptide by CD, TEM, STEM and in situ AFM. *Journal of structural biology* 180: 174–189.
30. Paivio A, Nordling E, Kallberg Y, Thyberg J, Johansson J (2004) Stabilization of discordant helices in amyloid fibril-forming proteins. *Protein science : a publication of the Protein Society* 13: 1251–1259.
31. Kallberg Y, Gustafsson M, Persson B, Thyberg J, Johansson J (2001) Prediction of amyloid fibril-forming proteins. *The Journal of biological chemistry* 276: 12945–12950.
32. Nerelius C, Sandegren A, Sargsyan H, Raunak R, Leijonmarck H, et al. (2009) Alpha-helix targeting reduces amyloid-beta peptide toxicity. *Proceedings of the National Academy of Sciences of the United States of America* 106: 9191–9196.
33. Ito M, Johansson J, Stromberg R, Nilsson L (2011) Unfolding of the amyloid beta-peptide central helix: mechanistic insights from molecular dynamics simulations. *PLoS one* 6: e17587.
34. Ito M, Johansson J, Stromberg R, Nilsson L (2012) Effects of ligands on unfolding of the amyloid beta-peptide central helix: mechanistic insights from molecular dynamics simulations. *PLoS one* 7: e30510.
35. Hatip FF, Suenaga M, Yamada T, Matsunaga Y (2009) Reversal of temperature-induced conformational changes in the amyloid-beta peptide, Abeta40, by the beta-sheet breaker peptides 16–23 and 17–24. *British journal of pharmacology* 158: 1165–1172.
36. Wang CC, Huang HB, Tsay HJ, Shiao MS, Wu WJ, et al. (2012) Characterization of Abeta aggregation mechanism probed by congo red. *Journal of biomolecular structure & dynamics* 30: 160–169.
37. Chen YR, Huang HB, Lo CJ, Wang CC, Su CL, et al. (2011) Abeta40(L17A/F19A) mutant diminishes the aggregation and neurotoxicity of Abeta40. *Biochemical and biophysical research communications* 405: 91–95.
38. Lee EK, Hwang JH, Shin DY, Kim DI, Yoo YJ (2005) Production of recombinant amyloid-beta peptide 42 as an ubiquitin extension. *Protein expression and purification* 40: 183–189.
39. Lobley A, Whitmore L, Wallace BA (2002) DICHROWEB: an interactive website for the analysis of protein secondary structure from circular dichroism spectra. *Bioinformatics* 18: 211–212.
40. Whitmore L, Wallace BA (2004) DICHROWEB, an online server for protein secondary structure analyses from circular dichroism spectroscopic data. *Nucleic acids research* 32: W668–673.
41. Nielsen L, Khurana R, Coats A, Frokjaer S, Brange J, et al. (2001) Effect of environmental factors on the kinetics of insulin fibril formation: elucidation of the molecular mechanism. *Biochemistry* 40: 6036–6046.
42. Biedler JL, Roffler-Tarlov S, Schachner M, Freedman LS (1978) Multiple neurotransmitter synthesis by human neuroblastoma cell lines and clones. *Cancer research* 38: 3751–3757.
43. Tamm LK, Tatulian SA (1997) Infrared spectroscopy of proteins and peptides in lipid bilayers. *Quarterly reviews of biophysics* 30: 365–429.
44. Chen Y, McMillan-Ward E, Kong J, Israels SJ, Gibson SB (2008) Oxidative stress induces autophagic cell death independent of apoptosis in transformed and cancer cells. *Cell death and differentiation* 15: 171–182.
45. Benseny-Cases N, Klementieva O, Cladera J (2012) In vitro Oligomerization and Fibrillogenesis of Amyloid-beta Peptides. *Sub-cellular biochemistry* 65: 53–74.
